# Supplementary material for: Multivalency transforms SARS-CoV-2 antibodies into ultrapotent neutralizers
Source: PubMed Central journal article supplement (PMC8209050; doi:10.1038/s41467-021-23825-2), 2021-06-16
Supplement: 41467_2021_23825_MOESM1_ESM.pdf [file 41467_2021_23825_MOESM1_ESM.pdf]

## **Supplementary Information**

**Multivalency transforms SARS-CoV-2 antibodies into ultrapotent neutralizers**

**Rujas *et al.***

## Supplementary Figure 1

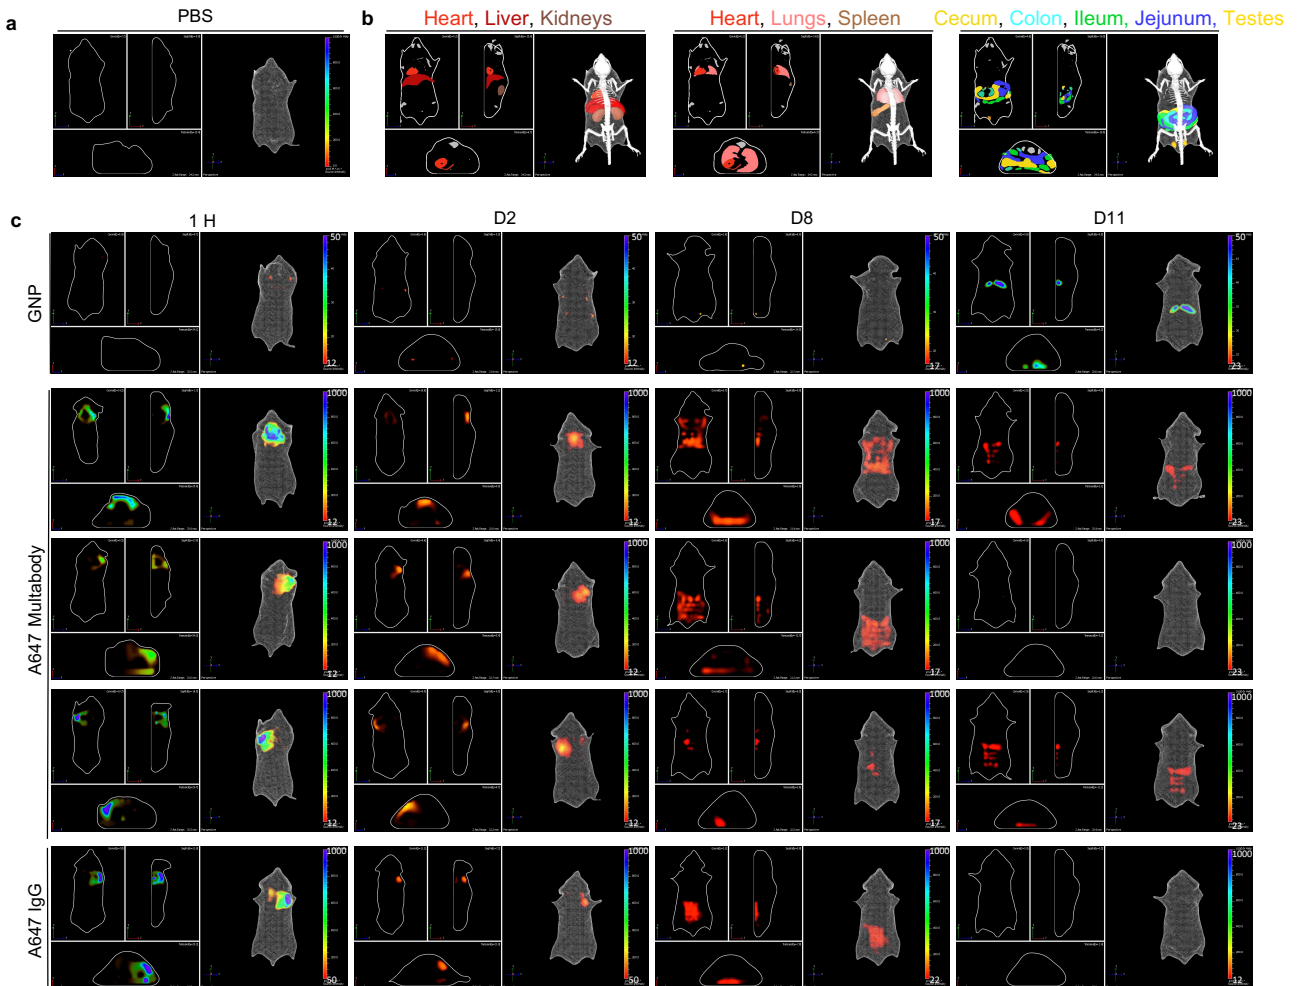

3D biodistribution of a surrogate mouse Multibody is comparable to its parental IgG. The biodistribution of 15 nm gold nanoparticles (GNP), MB and IgG samples labeled with Alexa-647 were visualized post subcutaneous injection into BALB/c mice via live non-invasive 3D whole body imaging. **a**) Representative 3D rendered fluorescent image overlaid with CT scan from PBS injected control. **b**) Depiction of the localization of major mouse organs overlaid with CT scan. **c**) 3D rendered fluorescent images overlaid with CT scan at 1 h (1H), two days (D2), eight days (D8) and 11 days (D11) post subcutaneous injection of gold nanoparticles (top), MB (three middle panels) or IgG (bottom panel). Each 3D image set is displayed showing dorsal view overlaid with CT scan (right), as well as a selected frontal (top left), medial (middle), and transverse (bottom left) planes based on signal localization. 3D fluorescent images were mapped to a rainbow look-up table (LUT), with color scale minimum set to background and maximum set to 50 pmol M<sup>-1</sup> cm<sup>-1</sup> (GNP) or 1000 pmol M<sup>-1</sup> cm<sup>-1</sup> (MB and IgG).



## Supplementary Figure 2

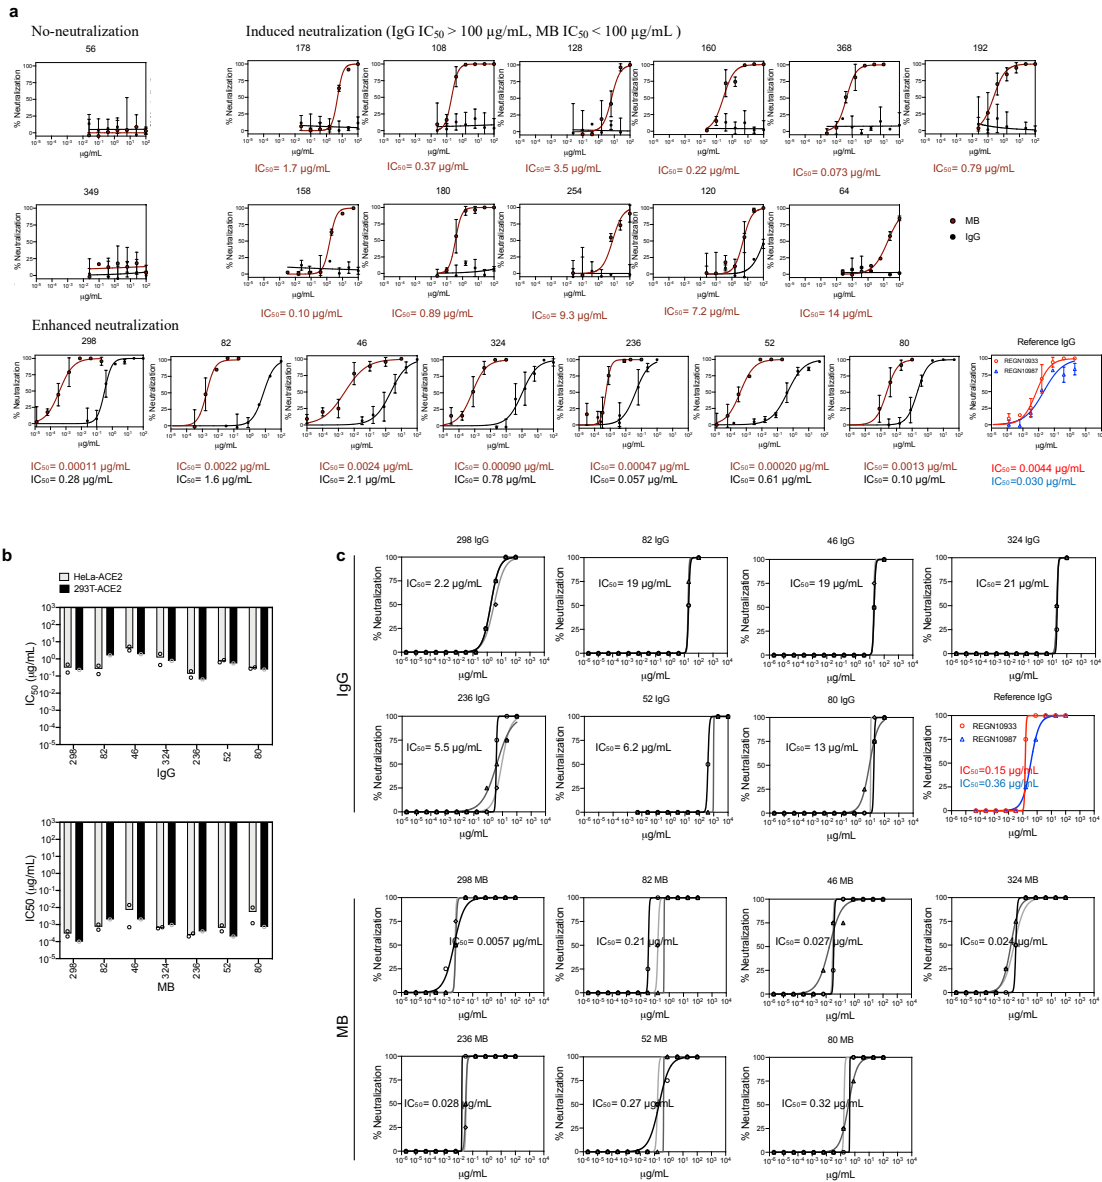

Neutralization of SARS-CoV-2 RBD-targeting Multabodies and their parental IgGs. **a)** Representative neutralization titration curves of 20 antibodies against SARS-CoV-2 PsV when displayed as IgGs (black) and MBs (dark red). The mean IC<sub>50</sub> values of three biological replicates are displayed for comparison. The mean values ± SD for two technical replicates are shown in each neutralization plot. Source data are provided as a Source Data file. **b)** Neutralization profiles of selected IgGs and MBs against SARS-CoV-2 PsV targeting 293T-ACE2 (black) and HeLa-ACE2 (gray) target cells. The mean IC<sub>50</sub> value and individual IC<sub>50</sub> values of three and two biological replicates are shown for 293T-ACE2 and HeLa-ACE2 cells, respectively. **c)** Neutralization titration curves of three biological replicates (different shades of gray) against the authentic SARS-CoV-2/SB2-P4-PB strain. The mean IC<sub>50</sub> is indicated. Neutralization potencies of recombinant mAbs REGN10933 (red) and REGN10987 (blue) are included in **(a)** and **(c)** as benchmarks for comparison.

### Supplementary Figure 3

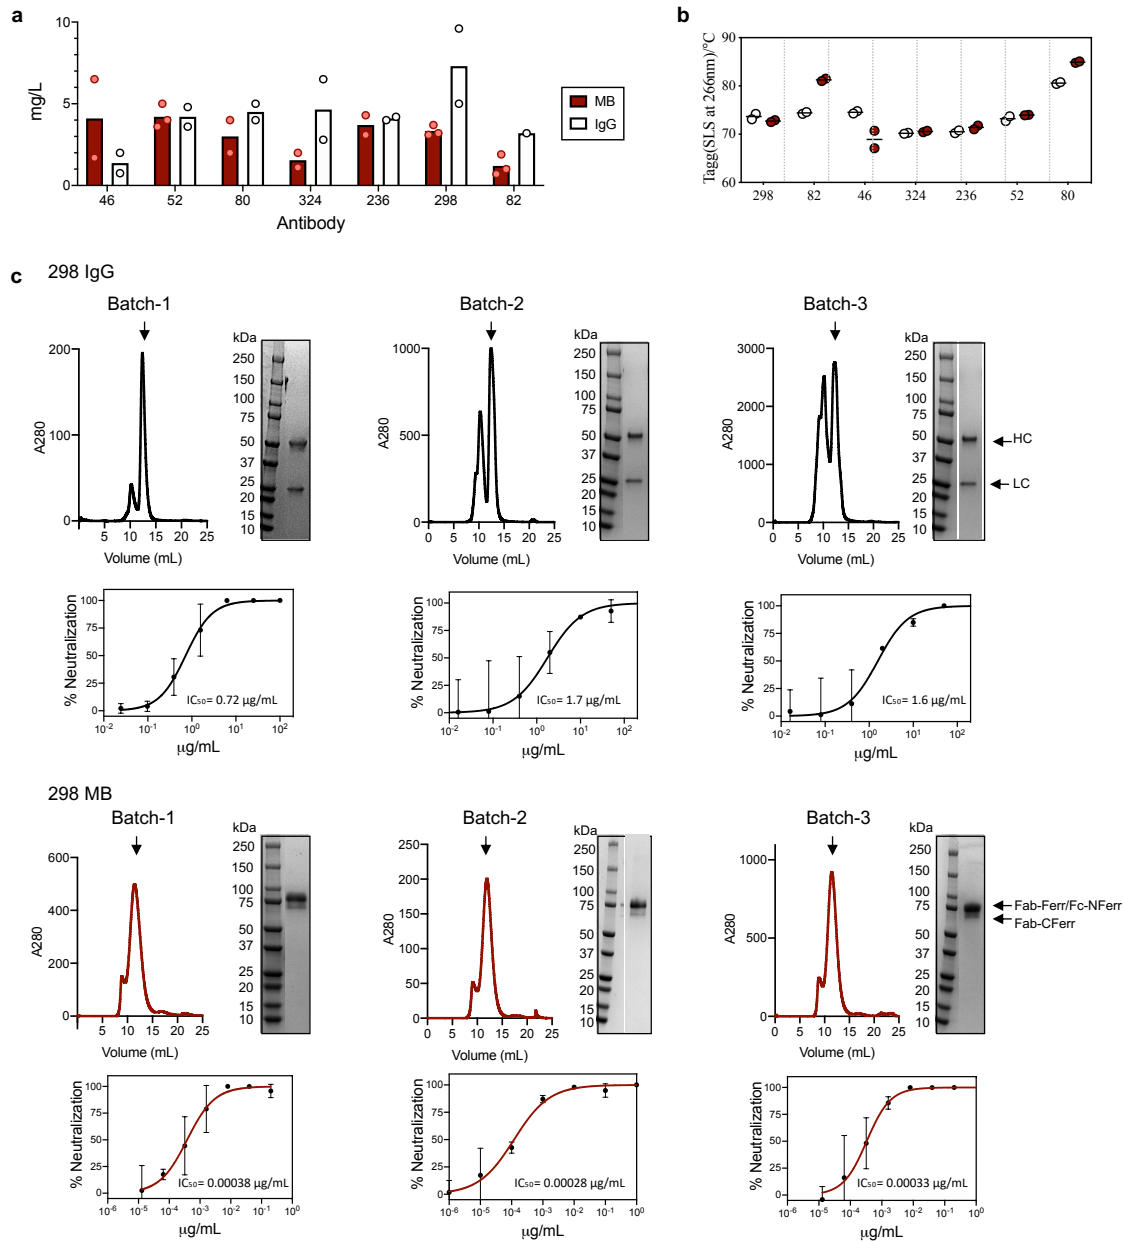

Expression yields and homogeneity of SARS-CoV-2 RBD-targeting Multabodies. **a)** Yield (mg/L) of the seven most potent IgGs (white) and their respective MBs (dark red). Mean values  $\pm$  SD for two biologically independent samples. **b)** Aggregation temperature ( $T_{agg}$ , °C) comparison as in **(a)**. The solid line denotes the mean  $T_{agg}$  value of two biologically independent samples. **c)** SEC chromatograms of 298 IgG (top row, black) and 298 MB (bottom row, dark red) from three independent expressions and purifications. Prior to SEC, in both cases, the samples were purified using Protein A affinity chromatography. The arrows indicate the peak used to perform a PsV neutralization assay from each batch. IC<sub>50</sub> values (μg/mL) are noted. Mean values  $\pm$  SD for two technical replicates are shown in each neutralization plot.

## Supplementary Figure 4

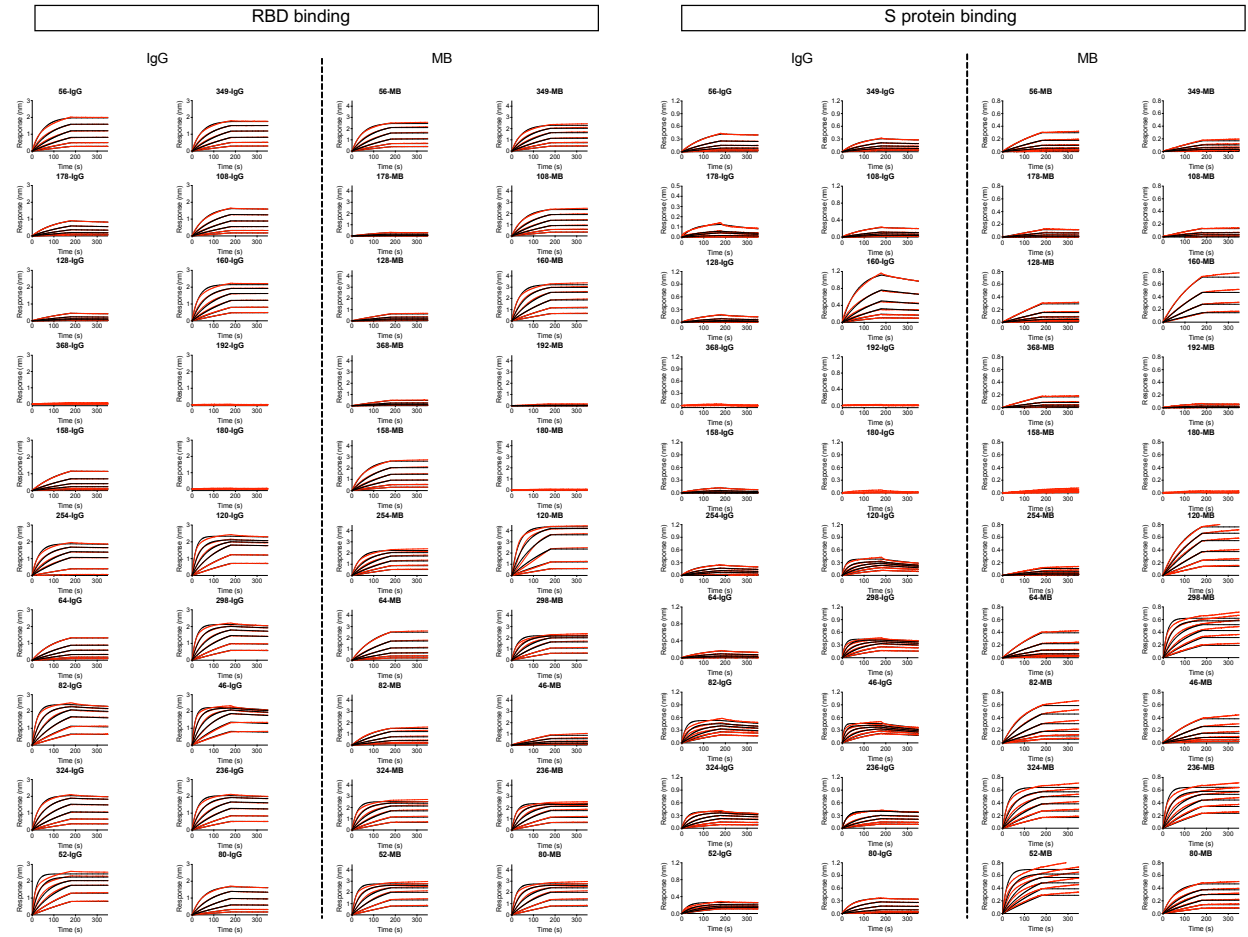

Binding profiles of IgGs and MBs. Sensograms of IgGs and MBs binding to RBD (left) and S protein (right) of SARS-CoV-2 immobilized onto Ni-NTA biosensors. 2-fold dilution series from 125 to 4 nM (IgG), and 16 to 0.5 nM (MB) were used. Red lines represent raw data, whereas black lines represent global fits.

## Supplementary Figure 5

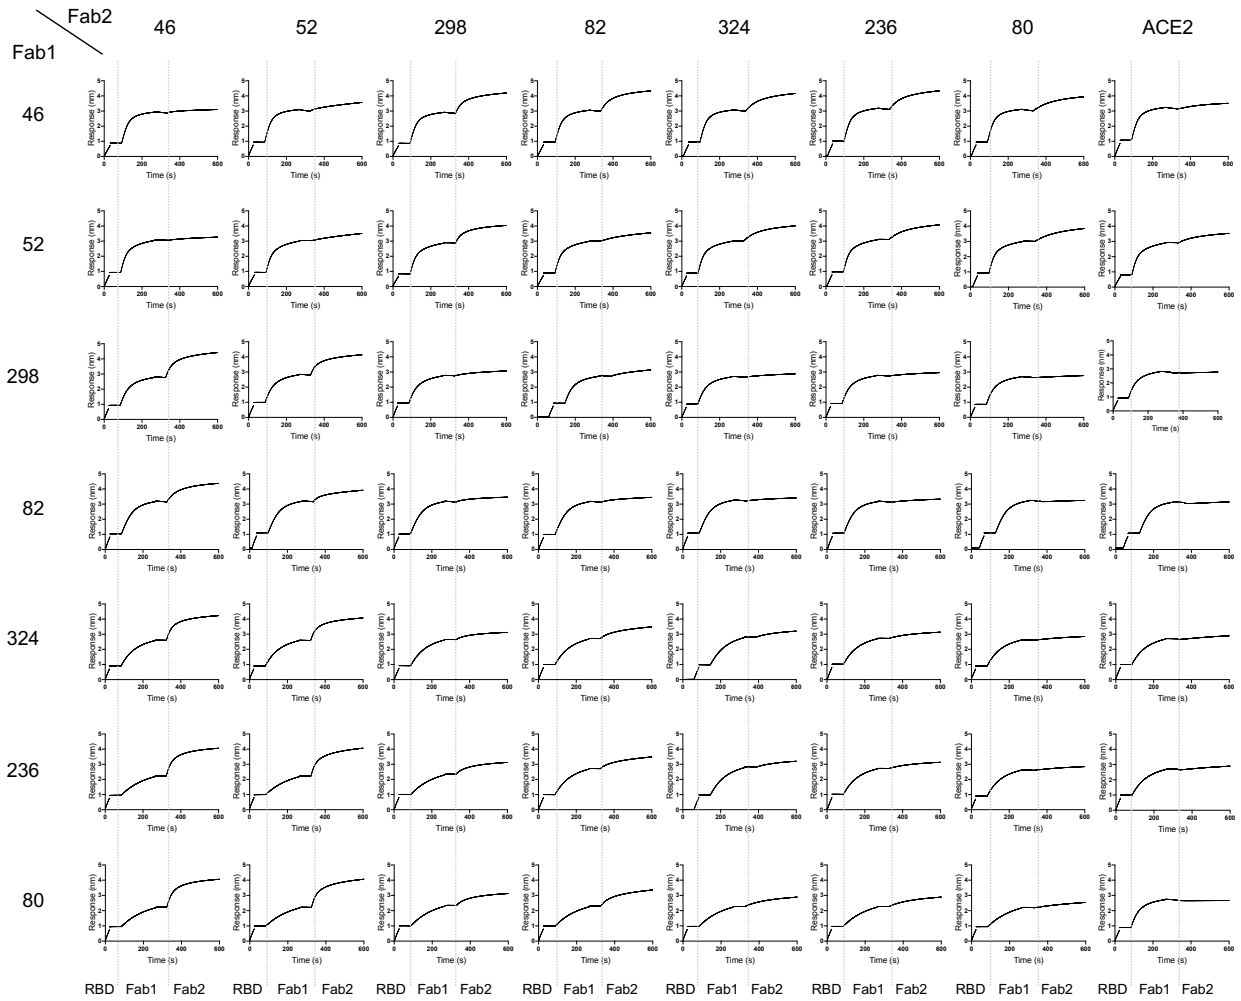

Epitope binning. mAb binding competition experiments to His-tagged RBD as measured by biolayer interferometry (BLI). 50  $\mu\text{g}/\text{ml}$  of mAb 1 was incubated for 3 min followed by incubation with 50  $\mu\text{g}/\text{ml}$  of mAb 2 for 5 min.

## Supplementary Figure 6

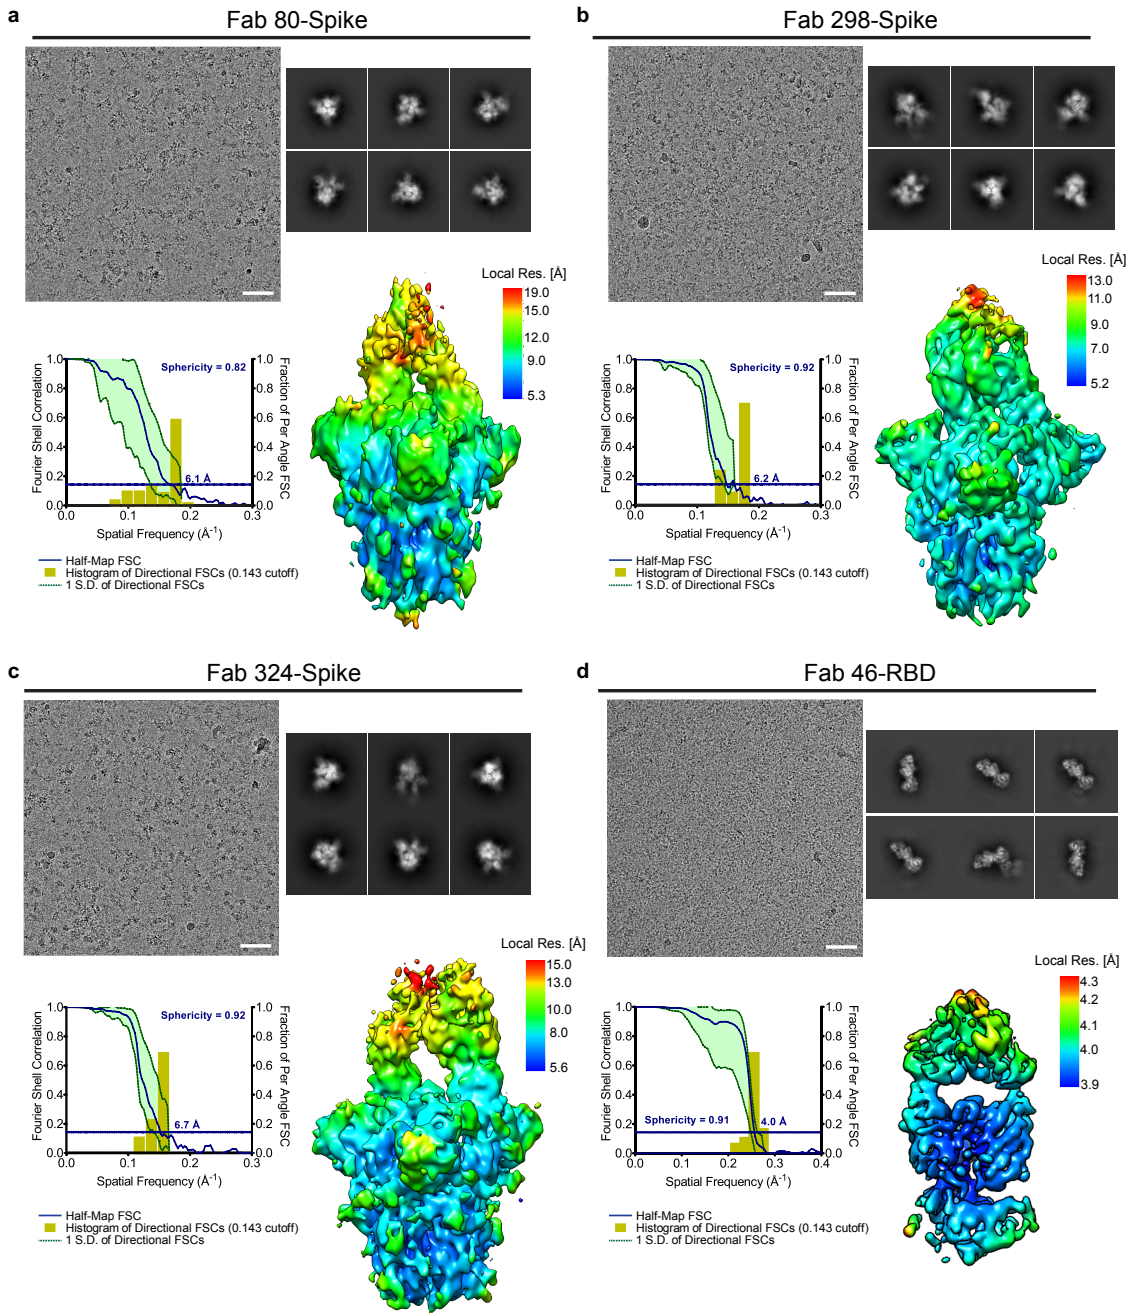

Cryo-EM analysis of the Fab-Spike and Fab-RBD complexes. Representative cryo-EM micrograph (scale bar 50 nm, top left), selected 2D class averages (top right), Fourier shell correlation curve from the final 3D non-uniform refinement (bottom left) and local resolution ( $\text{\AA}$ ) plotted on the surface of the cryo-EM map (bottom right) are shown for the Fab 80-Spike complex (a), the Fab 298-Spike complex (b), the Fab 324-Spike complex (c), and the Fab 46-RBD complex (d).



## Supplementary Figure 7

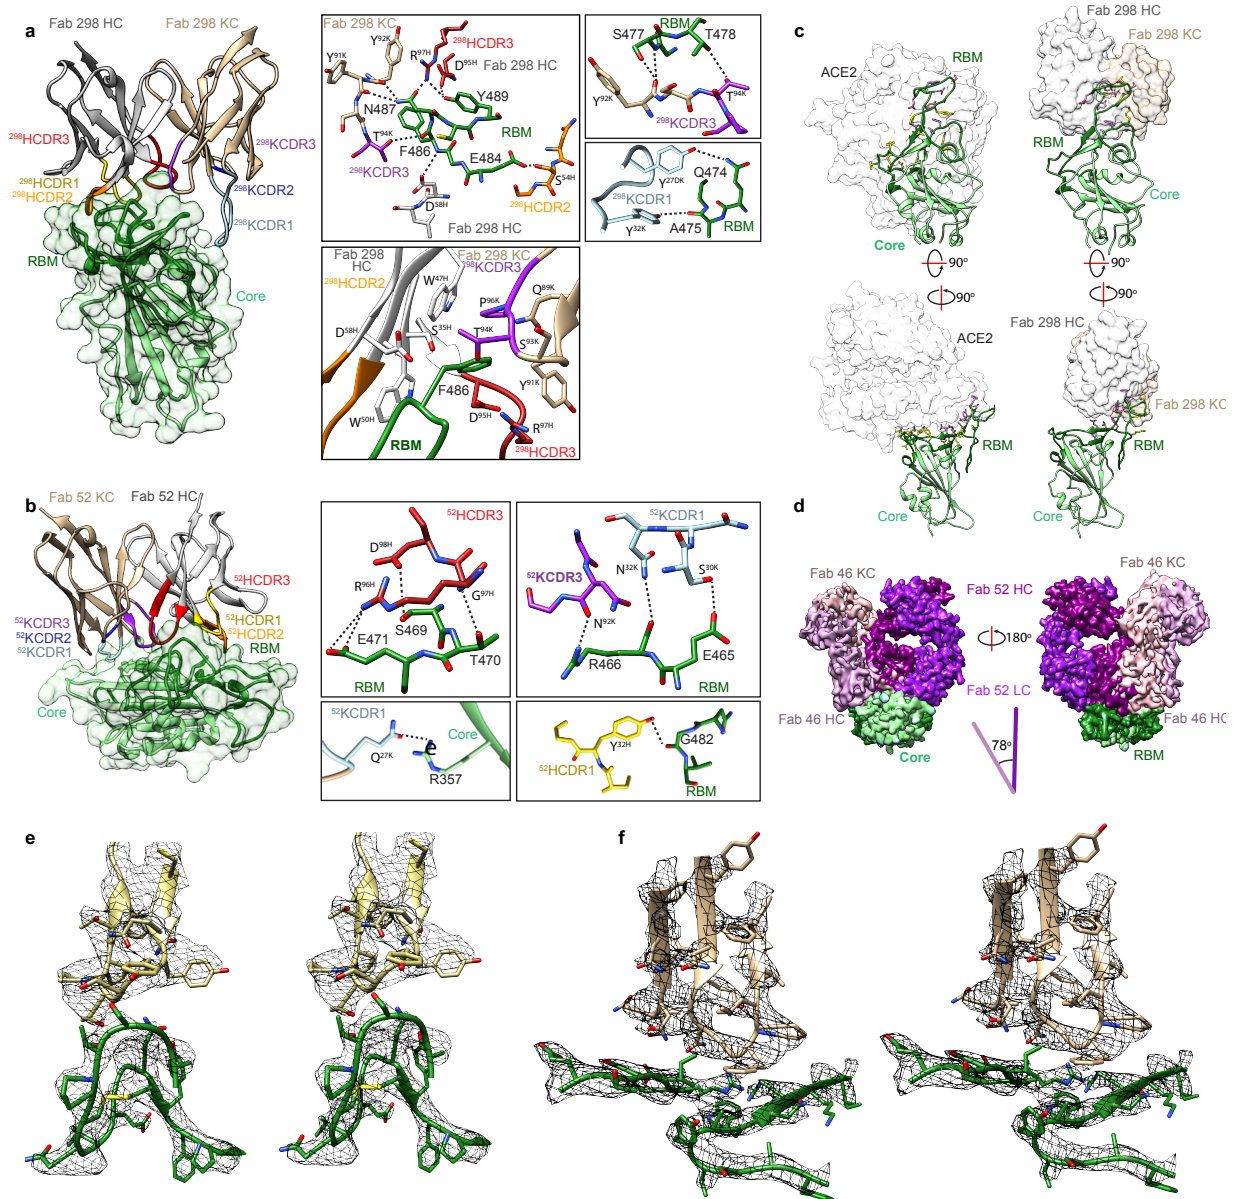

Binding interfaces of Fabs 52 and 298 and the RBD. Interaction of Fab 298 (**a**) and 52 (**b**) with RBD (light and dark green for the core and RBM regions, respectively) is mediated by complementarity determining regions (CDR) heavy (H) 1 (yellow), H2 (orange), H3 (red), kappa light (K) 1 (light blue) and K3 (purple). Critical binding residues are shown as sticks (insets). H-bonds and salt bridges are depicted as black dashed lines. L and H chains of Fabs are shown in tan and white, respectively. **c** Bottom and side views of ACE2 (left) and Fab 298 (right) bound to RBD. RBD side-chains that are part of the binding interface of the ACE2-RBD and Fab 298-RBD complexes are depicted in pink, while RBD side-chains unique to a given interface are shown in yellow. Surfaces of ACE2, variable regions of Fab 298 HC and Fab 298 KC are shown in white, grey and tan, respectively. The RBD is colored as in (**a**). **d** Superposition of Fabs 46 (light pink) and 52 (dark pink) when bound to the RBD (green) reveals a distinct angle of approach for the two mAbs. Stereo-image of the composite omit map electron density contoured at 1.3 sigma at the interfaces of **e**) 298-RBD and **f**) 52-RBD.

## Supplementary Figure 8

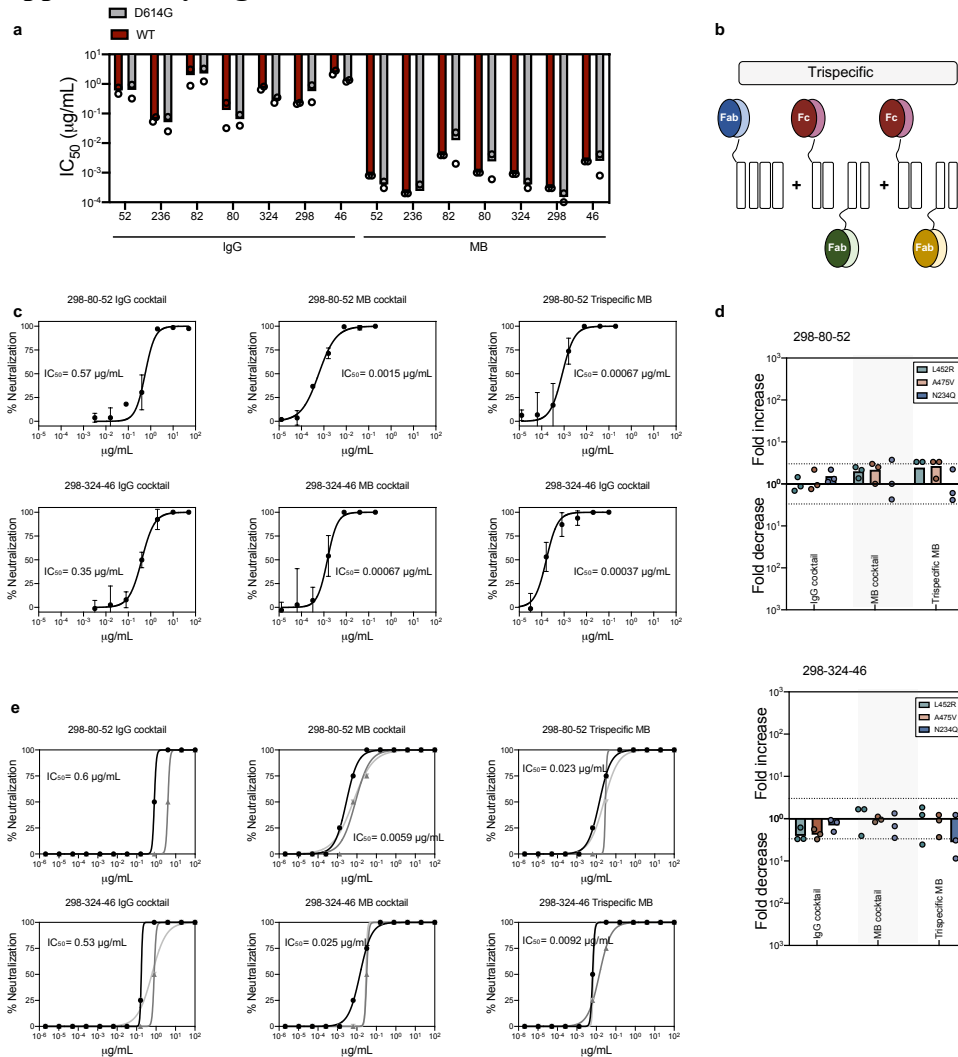

MBs potentially overcome SARS-CoV-2 sequence variability. **a**) Comparison of the neutralization potency of selected IgGs and MBs against WT PsV (dark red) and the more infectious D614G PsV (grey). **b**) Schematic representation of a tri-specific MB generated by combination of three Fab specificities and the Fc fragment using the MB split design. **c**) Cocktails and tri-specific MBs that combine the specificities of mAbs 298, 80 and 52, or 298, 324 and 46 were generated and tested against WT PsV. The mean values  $\pm$  SD for two technical replicates is represented in each representative neutralization plot. Source data are provided as a Source Data file. **d**) Neutralization potency change of cocktails and tri-specific MBs against pseudotyped SARS-CoV-2 variants in comparison to WT PsV. PsV variants that were sensitive to individual antibodies within the cocktails were selected. The area within the dotted lines represents a 3-fold change in  $IC_{50}$  value. This threshold was established as the cut-off for increased sensitivity (up bars) or increased resistance (down bars). **e**) Neutralization titration curves showing three biological replicates of cocktails and tri-specific MBs against the authentic SARS-CoV-2/SB2-P4-PB strain. Mean  $IC_{50}$  values of three biologically independent replicates are shown.

**Supplementary Table 1. Cryo-EM data collection and image processing.**

|                                               | Fab 80-Spike                           | Fab 298-Spike                          | Fab 324-Spike                          | Fab 46-RBD         |
|-----------------------------------------------|----------------------------------------|----------------------------------------|----------------------------------------|--------------------|
| EMDB ID                                       | EMD-22739                              | EMD-22740                              | EMD-22741                              | EMD-22738          |
| <b>Data Collection</b>                        |                                        |                                        |                                        |                    |
| Electron microscope                           | Titan Krios G3                         | Titan Krios G3                         | Titan Krios G3                         | Titan Krios G3     |
| Camera                                        | Falcon 4EC                             | Falcon 4EC                             | Falcon 4EC                             | Falcon 4EC         |
| Voltage (kV)                                  | 300                                    | 300                                    | 300                                    | 300                |
| Nominal magnification                         | 75,000                                 | 75,000                                 | 75,000                                 | 75,000             |
| Calibrated physical pixel size (Å)            | 1.03                                   | 1.03                                   | 1.03                                   | 1.03               |
| Total exposure (e- /Å <sup>2</sup> )          | 44                                     | 44                                     | 44                                     | 44                 |
| Number of frames                              | 29                                     | 29                                     | 29                                     | 29                 |
| <b>Image Processing</b>                       |                                        |                                        |                                        |                    |
| Motion correction software                    | <i>cryoSPARC v2, Relion MotionCorr</i> | <i>cryoSPARC v2, Relion MotionCorr</i> | <i>cryoSPARC v2, Relion MotionCorr</i> | <i>cryoSPARCv2</i> |
| CTF estimation software                       | <i>cryoSPARCv2</i>                     | <i>cryoSPARCv2</i>                     | <i>cryoSPARCv2</i>                     | <i>cryoSPARCv2</i> |
| Particle selection software                   | <i>cryoSPARCv2</i>                     | <i>cryoSPARCv2</i>                     | <i>cryoSPARCv2</i>                     | <i>cryoSPARCv2</i> |
| 3D map classification and refinement software | <i>cryoSPARCv2</i>                     | <i>cryoSPARCv2</i>                     | <i>cryoSPARCv2</i>                     | <i>cisTEM</i>      |
| Micrographs used (total)                      | 3610                                   | 7772                                   | 4478                                   | 4722               |
| 0° tilt                                       | 820                                    | 4259                                   | 1098                                   | 4722               |
| 40° tilt                                      | 2790                                   | 3513                                   | 3380                                   | 0                  |
| Global resolution (Å)                         | 6.2                                    | 6.2                                    | 6                                      | 4                  |
| Particles in final maps                       | 7,525                                  | 26,972                                 | 18,595                                 | 32,283             |



**Supplementary Table 2. X-ray crystallography data collection and refinement statistics**

| Fab 52- Fab 298-SARS-CoV-2 RBD       |                        |
|--------------------------------------|------------------------|
| PDB ID                               | 7K9Z                   |
| Data Collection                      |                        |
| Wavelength (Å)                       | 1.03317                |
| Space group                          | P 3 <sub>2</sub> 2 1   |
| Cell dimensions                      |                        |
| a,b,c (Å)                            | 87.6, 87.6, 325.1      |
| $\alpha, \beta, \gamma$ (°)          | 90.0, 90.0, 120.0      |
| Resolution (Å)                       | 39.66-2.95 (3.05-2.95) |
| No. molecules in ASU                 | 1                      |
| No. total observations               | 496,550 (43,958)       |
| No unique observations               | 31,545 (3,060)         |
| Multiplicity                         | 15.7 (14.3)            |
| R <sub>merge</sub> (%)               | 16.8 (74.2)            |
| R <sub>pim</sub> (%)                 | 4.3 (20.1)             |
| <I/ $\sigma$ I>                      | 12.3 (1.4)             |
| CC <sub>1/2</sub>                    | 99.8 (86.3)            |
| Completeness (%)                     | 99.9 (99.9)            |
| Refinement                           |                        |
| Non-hydrogen atoms                   | 8061                   |
| Macromolecule                        | 8047                   |
| Glycan                               | 14                     |
| R <sub>work</sub> /R <sub>free</sub> | 0.259/0.286            |
| Rms deviations                       |                        |
| Bond lengths (Å)                     | 0.002                  |
| Bond angles (°)                      | 0.53                   |
| Ramachandran plot                    |                        |
| Favored regions (%)                  | 95.6                   |
| Allowed regions (%)                  | 4.1                    |
| Outliers (%)                         | 0.3                    |
| Rotamer Outliers (%)                 | 2.6                    |
| B-factors (Å <sup>2</sup> )          |                        |
| Wilson B-factor                      | 78.6                   |
| Average B-factors                    | 103.9                  |
| Average macromolecule                | 103.9                  |
| Average glycan                       | 114.3                  |

**Supplementary Table 3. RBD-298 and RBD-52 contacting residues identified by PISA.**

| RBD | Residue            | BSA<br>(Å <sup>2</sup> ) | Interaction | Fab 298 (H-HC, K-KC)                                                                              |
|-----|--------------------|--------------------------|-------------|---------------------------------------------------------------------------------------------------|
| 453 | Tyr                | 2                        | vdW         | H-Thr31, H-Ile100                                                                                 |
| 455 | Leu                | 20                       | vdW         | H-Thr31, H-Ile100                                                                                 |
| 456 | Phe                | 30                       | vdW         | H-Thr31, H-Tyr32                                                                                  |
| 458 | Lys                | 1                        | vdW         | K-Ser27F                                                                                          |
| 474 | Gln                | 12                       | vdW         | K-Tyr27D                                                                                          |
|     | Gln <sup>NE2</sup> |                          | HB          | K-Tyr27D <sup>OH</sup>                                                                            |
| 475 | Ala                | 45                       | vdW         | K-Tyr27D, H-Tyr32, K-Tyr32, H-Arg97                                                               |
|     | Ala <sup>O</sup>   |                          | HB          | K-Tyr32 <sup>OH</sup>                                                                             |
| 476 | Gly                | 23                       | vdW         | K-Tyr27D, K-Tyr32, K-Tyr91, K-Tyr92, K-Ser93, H-Arg97                                             |
| 477 | Ser                | 75                       | vdW         | K-Tyr27D, K-Tyr92, K-Ser93, K-Thr94                                                               |
|     | Ser <sup>N</sup>   |                          | HB          | K-Tyr92 <sup>O</sup>                                                                              |
|     | Ser <sup>OG</sup>  |                          | HB          | K-Tyr92 <sup>O</sup>                                                                              |
| 478 | Thr                | 41                       | vdW         | K-Tyr27D, K-Tyr92, K-Ser93, K-Thr94                                                               |
|     | Thr <sup>OG1</sup> |                          | HB          | K-Thr94 <sup>OG1</sup>                                                                            |
| 484 | Glu                | 74                       | vdW         | H-Trp50, H-Ser52, H-Ser54, H-Gly55, H-Gly56, H-Thr57, H-Asp58                                     |
|     | Glu <sup>OE2</sup> |                          | HB          | H-Ser54 <sup>OG</sup>                                                                             |
| 485 | Gly                | 28                       | vdW         | H-Trp50, H-Thr57, H-Asp58                                                                         |
| 486 | Phe                | 169                      | vdW         | K-Gln89, K-Tyr91, K-Ser93, K-Thr94, K-Pro96, H-Ser35, H-Trp47, H-Trp50, H-Asp58, H-Asp95, H-Arg97 |
|     | Phe <sup>N</sup>   |                          | HB          | H-Asp58 <sup>OD2</sup>                                                                            |
|     | Phe <sup>O</sup>   |                          | HB          | K-Thr94 <sup>OG1</sup>                                                                            |
| 487 | Asn                | 41                       | vdW         | K-Tyr32, K-Tyr91, K-Ser93, K-Thr94, H-Asp95, H-Arg97                                              |
|     | Asn <sup>OD1</sup> |                          | HB          | H-Arg97 <sup>NH2</sup>                                                                            |
|     | Asn <sup>ND2</sup> |                          | HB          | K-Tyr91 <sup>O</sup> , K-Tyr92 <sup>O</sup>                                                       |
| 488 | Cys                | 1                        | vdW         | H-Trp50                                                                                           |

|                              |                   |     |     |                                                       |
|------------------------------|-------------------|-----|-----|-------------------------------------------------------|
| 489                          | Tyr               | 84  | vdW | H-Ser30, H-Thr31, H-Tyr32, H-Trp50, H-Asp95, H-Arg97, |
|                              | Tyr <sup>OH</sup> |     | HB  | H-Arg97 <sup>NH2</sup> , H-Asp95 <sup>OD2</sup>       |
| 493                          | Gln               | 45  | vdW | H-Ser30, H-Thr31, H-Ile100                            |
| Total BSA (Å <sup>2</sup> ): |                   | 691 |     |                                                       |

| RBD | Residue            | BSA (Å <sup>2</sup> ) | Interaction | Fab 52 (H-HC, K-KC)                                                             |
|-----|--------------------|-----------------------|-------------|---------------------------------------------------------------------------------|
| 346 | Arg                | 45                    | vdW         | H-Gln64                                                                         |
| 351 | Tyr                | 29                    | vdW         | K-Phe94, H-Ile52, H-Thr56, H-Asn58                                              |
| 352 | Ala                | 19                    | vdW         | K-Gly93, K-Phe94                                                                |
| 354 | Asn                | 6                     | vdW         | K-Phe94                                                                         |
| 355 | Arg                | 36                    | vdW         | K-Ser0, K-Gln27                                                                 |
|     | Arg <sup>O</sup>   |                       | HB          | K-Ser0 <sup>OG</sup>                                                            |
| 356 | Lys                | 13                    | vdW         | K-Ser0                                                                          |
| 357 | Arg                | 66                    | vdW         | K-Ser0, K-Gln27                                                                 |
|     | Arg <sup>N</sup>   |                       | HB          | K-Ser0 <sup>OG</sup>                                                            |
|     | Arg <sup>NH2</sup> |                       | HB          | K-Gln27 <sup>OE1</sup>                                                          |
| 449 | Tyr                | 13                    | vdW         | H-Phe554, H-Thr56                                                               |
| 450 | Asn                | 38                    | vdW         | H-Phe554, H-Thr56                                                               |
| 452 | Leu                | 47                    | vdW         | H-Ile52, H-Phe554, H-Gly55, H-Thr56                                             |
| 462 | Lys                | 1                     | vdW         | K-Ser30                                                                         |
| 465 | Glu                | 28                    | vdW         | K-Ser30, K-Asn31, K-Asn32, K-Asn92                                              |
|     | Glu <sup>OE2</sup> |                       | HB          | K-Ser30 <sup>OG</sup>                                                           |
| 466 | Arg                | 70                    | vdW         | K-Asn32, K-Asn92, K-93Gly, K-Phe94                                              |
|     | Arg <sup>O</sup>   |                       | HB          | K-Asn32 <sup>ND2</sup>                                                          |
|     | Arg <sup>NH1</sup> |                       | HB          | K-Asn92 <sup>O</sup>                                                            |
| 467 | Asp                | 12                    | vdW         | K-Asn32, K-Asn92, H-Asp98                                                       |
| 468 | Ile                | 102                   | vdW         | K-Asn32, K-Gly91, K-Asn92, K-93Gly, K-Phe94, K-Leu96, H-Arg96, H-Gly97, H-Asp98 |
| 469 | Ser                | 37                    | vdW         | K-Asn32, H-Arg96, H-Gly97, H-Asp98                                              |
|     | Ser <sup>OG</sup>  |                       | HB          | H-Asp98 <sup>OD1</sup>                                                          |
| 470 | Thr                | 67                    | vdW         | H-Ser31, H-Tyr32, H-Gly33, H-Ile52, H-Asp95, H-Arg96, H-Gly97, H-Asp98          |

|                              |                    |     |     |                                                                |
|------------------------------|--------------------|-----|-----|----------------------------------------------------------------|
|                              | Thr <sup>OG1</sup> |     | HB  | H-Gly97 <sup>N</sup>                                           |
| 471                          | Glu                | 39  | vdW | H-Tyr32, H-Arg96, H-Gly97, H-Asp98                             |
|                              | Glu <sup>OE1</sup> |     | SB  | H-Arg96 <sup>NH2</sup>                                         |
|                              | Glu <sup>OE2</sup> |     | SB  | H-Arg96 <sup>NH2</sup>                                         |
| 472                          | Ile                | 7   | vdW | H-Ser31, H-Tyr32, H-Arg96                                      |
| 481                          | Asn                | 1   | vdW | H-Tyr32                                                        |
| 482                          | Gly                | 42  | vdW | H-Ser31, H-Tyr32                                               |
|                              | Gly <sup>O</sup>   |     | HB  | H-Tyr32 <sup>OH</sup>                                          |
| 483                          | Val                | 12  | vdW | H-Thr28, H-Ser31, H-Tyr32                                      |
| 484                          | Glu                | 53  | vdW | H-Thr28, H-Phe29, H-Thr30, H-Ser31, H-Met54                    |
| 490                          | Phe                | 87  | vdW | H-Thr30, H-Ser31, H-Tyr32, H-Gly33, H-Ile52, H-Met54, H-Phe554 |
| 492                          | Leu                | 13  | vdW | H-Ile52, H-Met54, H-Phe554                                     |
| 493                          | Gln                | 8   | vdW | H-Phe554                                                       |
| 494                          | Ser                | 17  | vdW | H-Phe554                                                       |
| Total BSA (Å <sup>2</sup> ): |                    | 904 |     |                                                                |

| Fab 298 | Residue-Chain        | BSA (Å <sup>2</sup> ) | Interaction | RBD                                    |
|---------|----------------------|-----------------------|-------------|----------------------------------------|
| 30      | Ser-H                | 9                     | vdW         | Tyr489, Gln493                         |
| 31      | Thr-H                | 68                    | vdW         | Tyr453, Leu455, Phe456, Tyr489, Gln493 |
| 32      | Tyr-H                | 57                    | vdW         | Phe456, Ala475, Tyr489                 |
| 35      | Ser-H                | 8                     | vdW         | Phe486                                 |
| 47      | Trp-H                | 23                    | vdW         | Phe486                                 |
| 50      | Trp-H                | 79                    | vdW         | Glu484, Gly485, Phe486, Cys488, Tyr489 |
| 52      | Ser-H                | 8                     | vdW         | Glu484                                 |
| 54      | Ser-H                | 17                    | vdW         | Glu484                                 |
|         | Ser <sup>OG</sup> -H |                       | HB          | Glu484 <sup>OE2</sup>                  |
| 55      | Gly-H                | 7                     | vdW         | Glu484                                 |
| 56      | Gly-H                | 7                     | vdW         | Glu484                                 |
| 57      | Thr-H                | 10                    | vdW         | Glu484, Gly485                         |
| 58      | Asp-H                | 28                    | vdW         | Glu484, Gly485, Phe486                 |

|                              |                       |    |     |                                              |
|------------------------------|-----------------------|----|-----|----------------------------------------------|
|                              | Asp <sup>OD2</sup> -H |    | HB  | Phe486 <sup>N</sup>                          |
| 95                           | Asp-H                 | 15 | vdW | Phe486, Asn487, Tyr489                       |
|                              | Asp <sup>OD2</sup> -H |    | HB  | Tyr489 <sup>OH</sup>                         |
| 97                           | Arg-H                 | 61 | vdW | Asn487, Tyr489                               |
|                              | Arg <sup>NH2</sup> -H |    | HB  | Asn487 <sup>OD1</sup> , Tyr489 <sup>OH</sup> |
| 100                          | Ile-H                 | 7  | vdW | Tyr453, Leu455, Gln493                       |
| 27D                          | Tyr-K                 | 59 | vdW | Gln474, Ala475, Gly476, Ser477, Thr478       |
|                              | Tyr <sup>OH</sup> -K  |    | HB  | Gln474 <sup>NE2</sup>                        |
| 27F                          | Ser-K                 | 1  | vdW | Lys458                                       |
| 32                           | Tyr-K                 | 28 | vdW | Ala475, Gly476, Asn487                       |
|                              | Tyr <sup>OH</sup> -K  |    | HB  | Ala475 <sup>O</sup>                          |
| 89                           | Gln-K                 | 1  | vdW | Phe486                                       |
| 91                           | Tyr-K                 | 30 | vdW | Gly476, Phe486, Asn487                       |
|                              | Tyr <sup>O</sup> -K   |    | HB  | Asn487 <sup>ND2</sup>                        |
| 92                           | Tyr-K                 | 40 | vdW | Gly476, Ser477, Thr478                       |
|                              | Tyr <sup>O</sup> -K   |    | HB  | Asn487 <sup>ND2</sup>                        |
|                              | Tyr <sup>O</sup> -K   |    | HB  | Ser477 <sup>N</sup> , Ser477 <sup>OG</sup>   |
| 93                           | Ser-K                 | 26 | vdW | Gly476, Ser477, Thr478, Phe486, Ser487       |
| 94                           | Thr-K                 | 57 | vdW | Ser477, Thr478, Phe486, Asn487               |
|                              | Thr <sup>OG1</sup> -K |    | HB  | Thr478 <sup>OG1</sup> , Phe486 <sup>O</sup>  |
| 96                           | Pro-K                 | 23 | vdW | Phe486                                       |
| Total BSA (Å <sup>2</sup> ): |                       |    | 669 |                                              |

| Fab 52 | Residue-Chain        | BSA (Å <sup>2</sup> ) | Interaction | RBD                                                    |
|--------|----------------------|-----------------------|-------------|--------------------------------------------------------|
| 28     | Thr-H                | 24                    | vdW         | Val483, Glu484                                         |
| 30     | Thr-H                | 3                     | vdW         | Glu484, Phe490                                         |
| 31     | Ser-H                | 66                    | vdW         | Glu471, Gly482, Val483, Glu484, Phe490                 |
| 32     | Tyr-H                | 51                    | vdW         | Thr470, Glu471, Ile472, Asn481, Gly482, Val483, Phe490 |
|        | Tyr <sup>OH</sup> -H |                       | HB          | Gly482 <sup>O</sup>                                    |

|                              |                       |     |     |                                                        |
|------------------------------|-----------------------|-----|-----|--------------------------------------------------------|
| 33                           | Gly-H                 | 7   | vdW | Thr470, Phe490                                         |
| 52                           | Ile-H                 | 62  | vdW | Tyr351, Leu452, Thr470, Phe490, Leu492                 |
| 53                           | Met-H                 | 38  | vdW | Glu484, Phe490, Leu492                                 |
| 54                           | Phe-H                 | 110 | vdW | Tyr449, Asn450, Leu452, Phe490, Leu492, Gln493, Ser494 |
| 55                           | Gly-H                 | 4   | vdW | Leu452                                                 |
| 56                           | Thr-H                 | 57  | vdW | Tyr351, Tyr449, Asn450, Leu452                         |
| 58                           | Asn-H                 | 10  | vdW | Tyr351                                                 |
| 64                           | Gln-H                 | 43  | vdW | Arg346                                                 |
| 95                           | Asp-H                 | 2   | vdW | Thr470                                                 |
| 96                           | Arg-H                 | 64  | vdW | Ile468, Ser469, Thr470, Glu471, Ile472                 |
|                              | Arg <sup>NH2</sup> -H |     | SB  | Glu471 <sup>OE1</sup> , Glu471 <sup>OE2</sup>          |
| 97                           | Gly-H                 | 64  | vdW | Ile468, Ser469, Thr470, Glu471                         |
|                              | Gly <sup>N</sup> -H   |     | HB  | Thr470 <sup>OG1</sup>                                  |
| 98                           | Asp-H                 | 28  | vdW | Asp467, Ile468, Ser469, Thr470, Glu471                 |
|                              | Asp <sup>OD1</sup> -H |     | HB  | Ser469 <sup>OG</sup>                                   |
| 0                            | Ser-K                 | 77  | vdW | Arg355, Lys356, Arg357                                 |
|                              | Ser <sup>OG</sup> -K  |     | HB  | Arg355 <sup>O</sup> , Arg357 <sup>N</sup>              |
| 27                           | Gln-K                 | 60  | vdW | Arg355, Arg357                                         |
|                              | Gln <sup>OE1</sup> -K |     | HB  | Arg357 <sup>NH2</sup>                                  |
| 30                           | Ser-K                 | 28  | vdW | Lys462, Glu465                                         |
|                              | Ser <sup>OG</sup> -K  |     | HB  | Glu465 <sup>OE2</sup>                                  |
| 32                           | Asn-K                 | 19  | vdW | Glu465, Arg466, Asp467, Ile468, Ser469                 |
|                              | Asn <sup>ND2</sup> -K |     | HB  | Arg466 <sup>O</sup>                                    |
| 91                           | Gly-K                 | 18  | vdW | Ile468                                                 |
| 92                           | Asn-K                 | 56  | vdW | Glu465, Arg466, Asp467, Ile468                         |
|                              | Asn <sup>O</sup> -K   |     | HB  | Arg466 <sup>NH1</sup>                                  |
| 93                           | Gly-K                 | 22  | vdW | Ala352, Arg466, Ile468                                 |
| 94                           | Phe-K                 | 56  | vdW | Tyr351, Ala352, Asn354, Arg466, Ile468                 |
| 96                           | Leu-K                 | 5   | vdW | Ile468                                                 |
| Total BSA (Å <sup>2</sup> ): |                       |     | 974 |                                                        |

---

vdW: van der Waals interaction (5.0 Å cut-off)

HB: hydrogen bond (3.8 Å cut-off)

SB: salt bridge (4.0 Å cut-off)

**Supplementary Table 4. Primer sequences**

| Primer name | Primer                            |
|-------------|-----------------------------------|
| N234Q_fwd   | CAGATCACCCGGTTTCAGACACTGCTGGCC    |
| N234Q_rev   | GATGCCGATGGGCAGATCCACCAGGGG       |
| L452R_fwd   | CGGTACCGGCTGTTCCGGAAGTCCAATCTG    |
| L452_rev    | GTAATTGTAGTTGCCGCCGACTTTGG        |
| A475V_fwd   | GTGGGCAGCACCCCTTGTAACGGCGTGGAAG   |
| A475V_rev   | CTGATAGATCTCGGTGGAGATGTCCC        |
| V483A_fwd   | GCCGAAGGCTTCAACTGCTACTTCCCCTGC    |
| V483A_rev   | GCCGTTACAAGGGGTGCTGCCGGCC         |
| N439K_fwd   | AAGAACCTGGACTCCAAAGTCGGCGGCAACTAC |
| N439K_rev   | GCTGTTCCAGGCAATCACACAGCCGGTG      |



**Supplementary Data 1. Sequence, biophysical and functional details of antibodies.**
