# Supplementary material for: Multivalency transforms SARS-CoV-2 antibodies into ultrapotent neutralizers
Source: PubMed Central journal article supplement (PMC8209050; doi:10.1038/s41467-021-23825-2), 2021-06-16
Supplement: 41467_2021_23825_MOESM3_ESM.pdf [file 41467_2021_23825_MOESM3_ESM.pdf]

### **Description of Additional Supplementary Files**

File Name: Supplementary Data 1

Description: Information of the monoclonal antibody sequences, their binding affinities to RBD and neutralization IC50 values.
